# Supplementary material for: Dynamic control of enhancer activity drives stage-specific gene expression during flower morphogenesis
Source: PubMed Central journal article supplement (PMC6461659; doi:10.1038/s41467-019-09513-2), 2019-04-12
Supplement: 41467_2019_9513_MOESM3_ESM.pdf [file 41467_2019_9513_MOESM3_ESM.pdf]

## **Description of Additional Supplementary Files**

File Name: Supplementary Data 1

Description: The list of H3K27ac peaks

File Name: Supplementary Data 2

Description: H3K27ac dynamics during flower development

File Name: Supplementary Data 3

Description: The list of DHS-predicted intergenic enhancers

File Name: Supplementary Data 4

Description: Enhancer validation by GUS experiments

File Name: Supplementary Data 5

Description: Enhancer dynamics during flower development

File Name: Supplementary Data 6

Description: The list of intragenic enhancers

File Name: Supplementary Data 7

Description: The list of enhancer clusters
